# Supplementary material
Source: PubMed Central journal article supplement (PMC4805463)

00:00:02

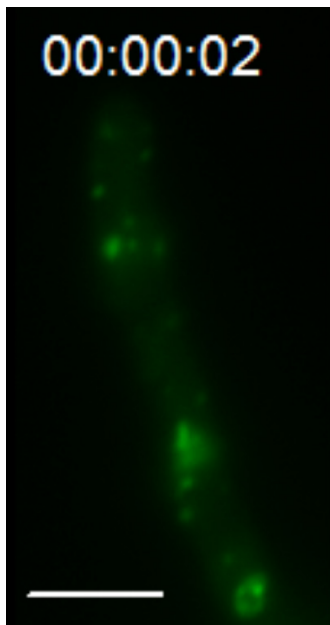

Supplement: NIHMS763144-supplement-3.pdf [file NIHMS763144-supplement-3.pdf]
